# Supplementary material
Source: publisher figshare collection journal article supplement (https://brill.figshare.com/ndownloader/files/26241910)
Supplement: Supplementary file 1 [file 26241910]

**Table A1.** Pairwise correlation coefficients for all climatic variables within model 1.

|  | Days since rainfall (>3 mm) to 8 pm | Lunar illumination (%) | Early night temperature (°C) | Early night humidity (%) | Early night barometric pressure (hPa) | Early night wind speed (km/h) | Day-time maximum temperature (°C) | Day-time minimum temperature (°C) | Day-time mean temperature (°C) | Day-time mean humidity (%) | Day-time mean barometric pressure (hPa) | Day-time mean wind speed (km/h) |
| --- | --- | --- | --- | --- | --- | --- | --- | --- | --- | --- | --- | --- |
| Days since rainfall (>3 mm) to 8 pm | 1 | –0.0425 | 0.2608 | –0.1566 | 0.0776 | 0.0538 | 0.2435 | 0.2021 | 0.301 | –0.2475 | 0.0844 | –0.0716 |
| Lunar illumination (%) | – | 1 | –0.0027 | 0.1354 | –0.0174 | 0.1151 | –0.0683 | 0.0504 | –0.0488 | 0.1904 | 0.0044 | 0.019 |
| Early night temperature (°C) | – | – | 1 | –0.5697 | –0.6431 | 0.0548 | 0.7283 | 0.743 | 0.8786 | –0.4202 | –0.5541 | –0.2271 |
| Early night humidity (%) | – | – | – | 1 | 0.405 | –0.0123 | –0.4837 | –0.1851 | –0.496 | 0.8129 | 0.3984 | 0.0627 |
| Early night barometric pressure (hPa) | – | – | – | – | 1 | –0.1503 | –0.5271 | –0.4777 | –0.5722 | 0.2789 | 0.9431 | –0.0077 |
| Early night wind speed (km/h) | – | – | – | – | – | 1 | 0.0988 | 0.0183 | 0.0978 | –0.0062 | –0.1721 | 0.7029 |
| Day-time maximum temperature (°C) | – | – | – | – | – | – | 1 | 0.6401 | 0.9364 | –0.6577 | –0.5679 | –0.1721 |
| Day-time minimum temperature (°C) | – | – | – | – | – | – | – | 1 | 0.803 | –0.231 | –0.4807 | –0.1285 |
| Day-time mean temperature (°C) | – | – | – | – | – | – | – | – | 1 | –0.5898 | –0.5769 | –0.1741 |
| Day-time mean humidity (%) | – | – | – | – | – | – | – | – | – | 1 | 0.3319 | 0.0755 |
| Day-time mean barometric pressure (hPa) | – | – | – | – | – | – | – | – | – | – | 1 | –0.1078 |
| Day-time mean wind speed (km/h) | – | – | – | – | – | – | – | – | – | – | – | 1 |
